# Supplementary material for: The evolutionary history of Cytochrome P450 genes in four filamentous Ascomycetes
Source: PubMed Central journal article supplement (PMC1828051; doi:10.1186/1471-2148-7-30), 2007-02-26

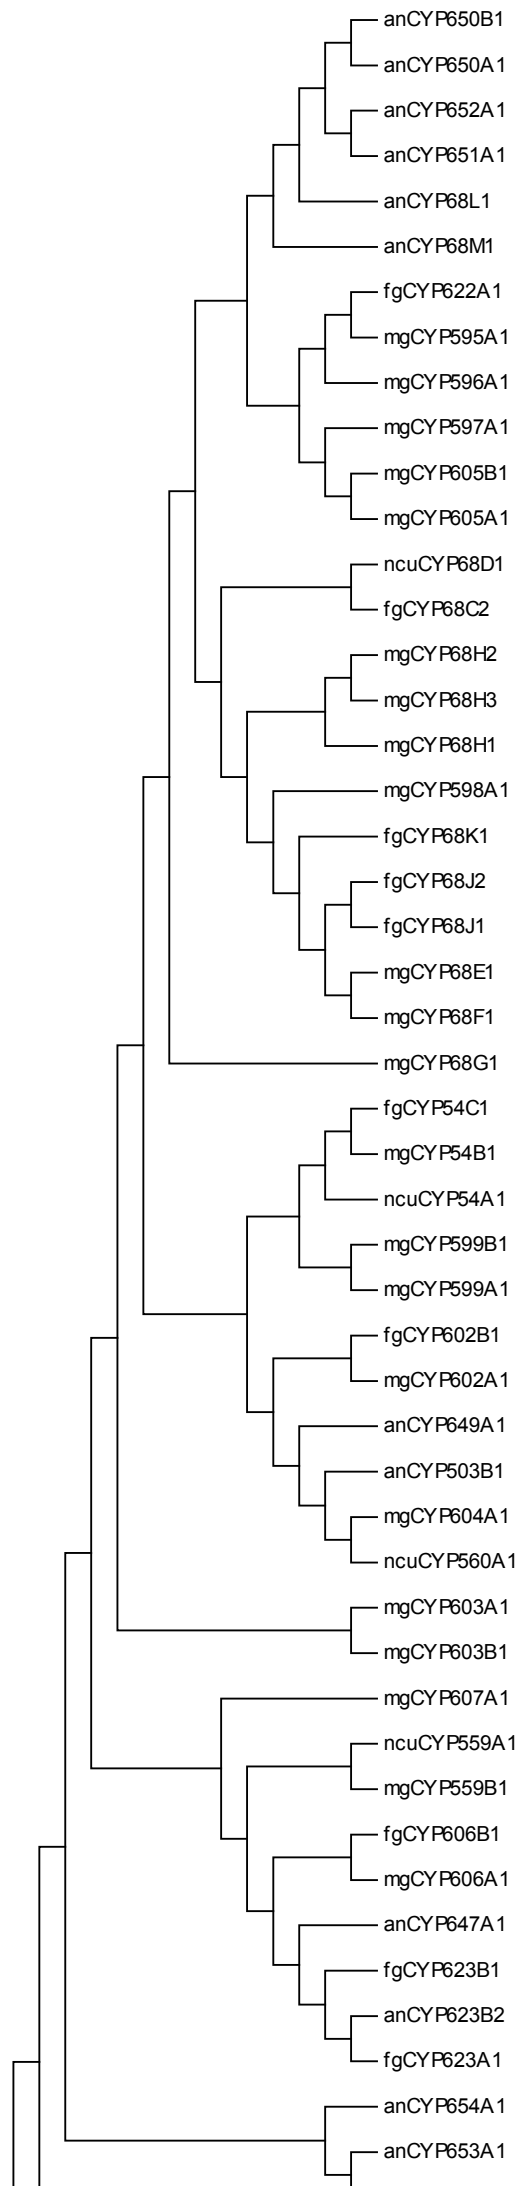

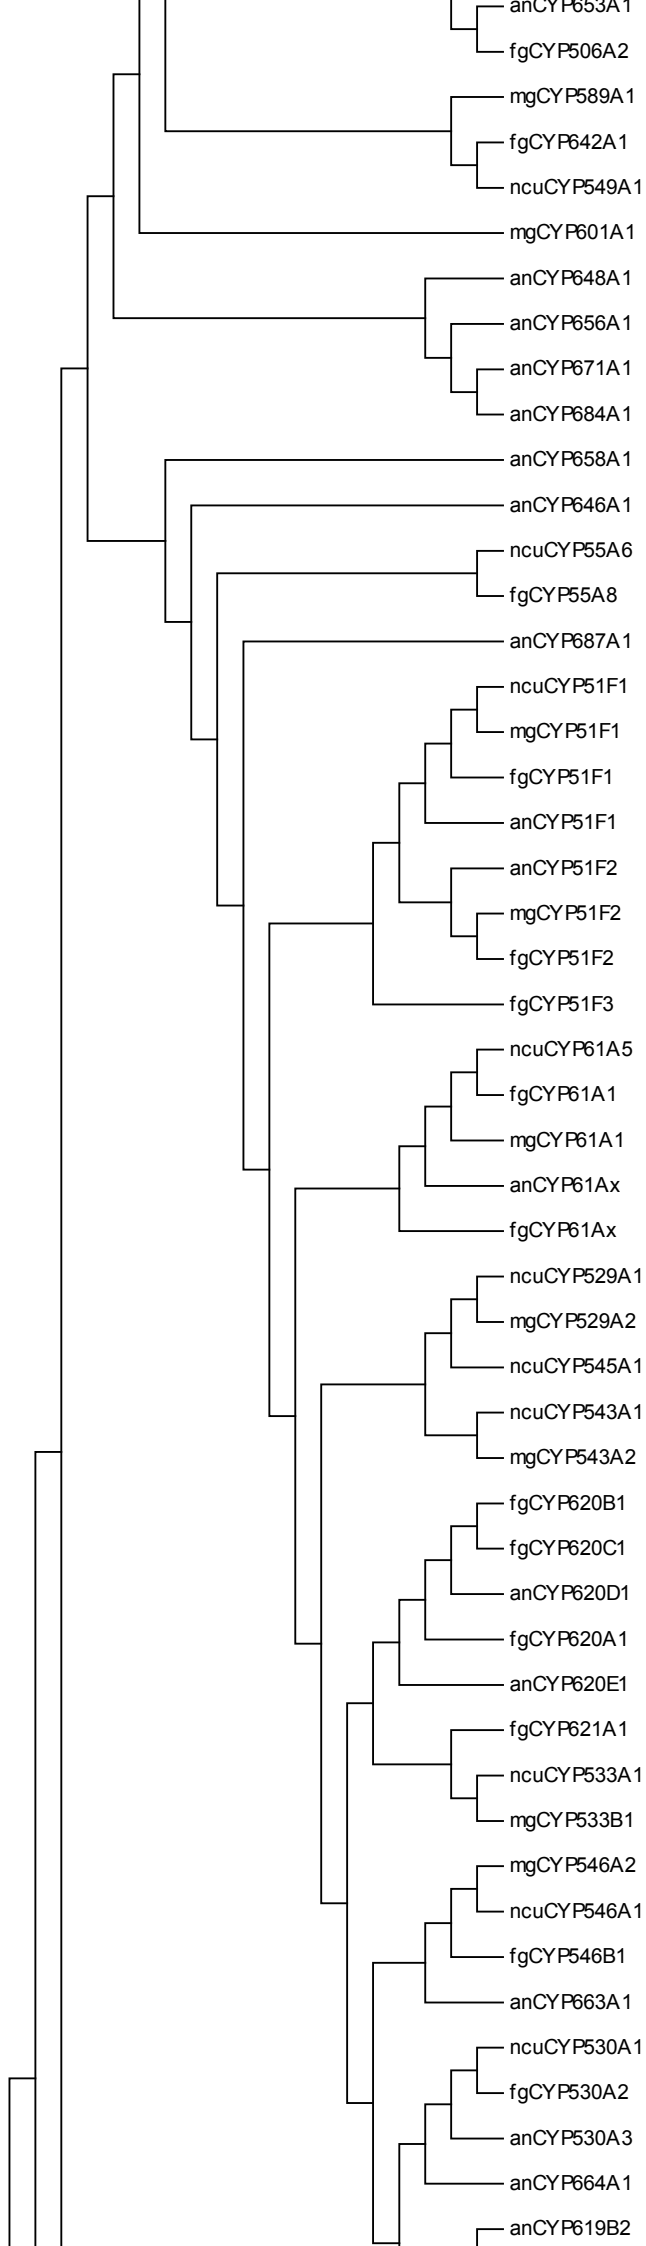

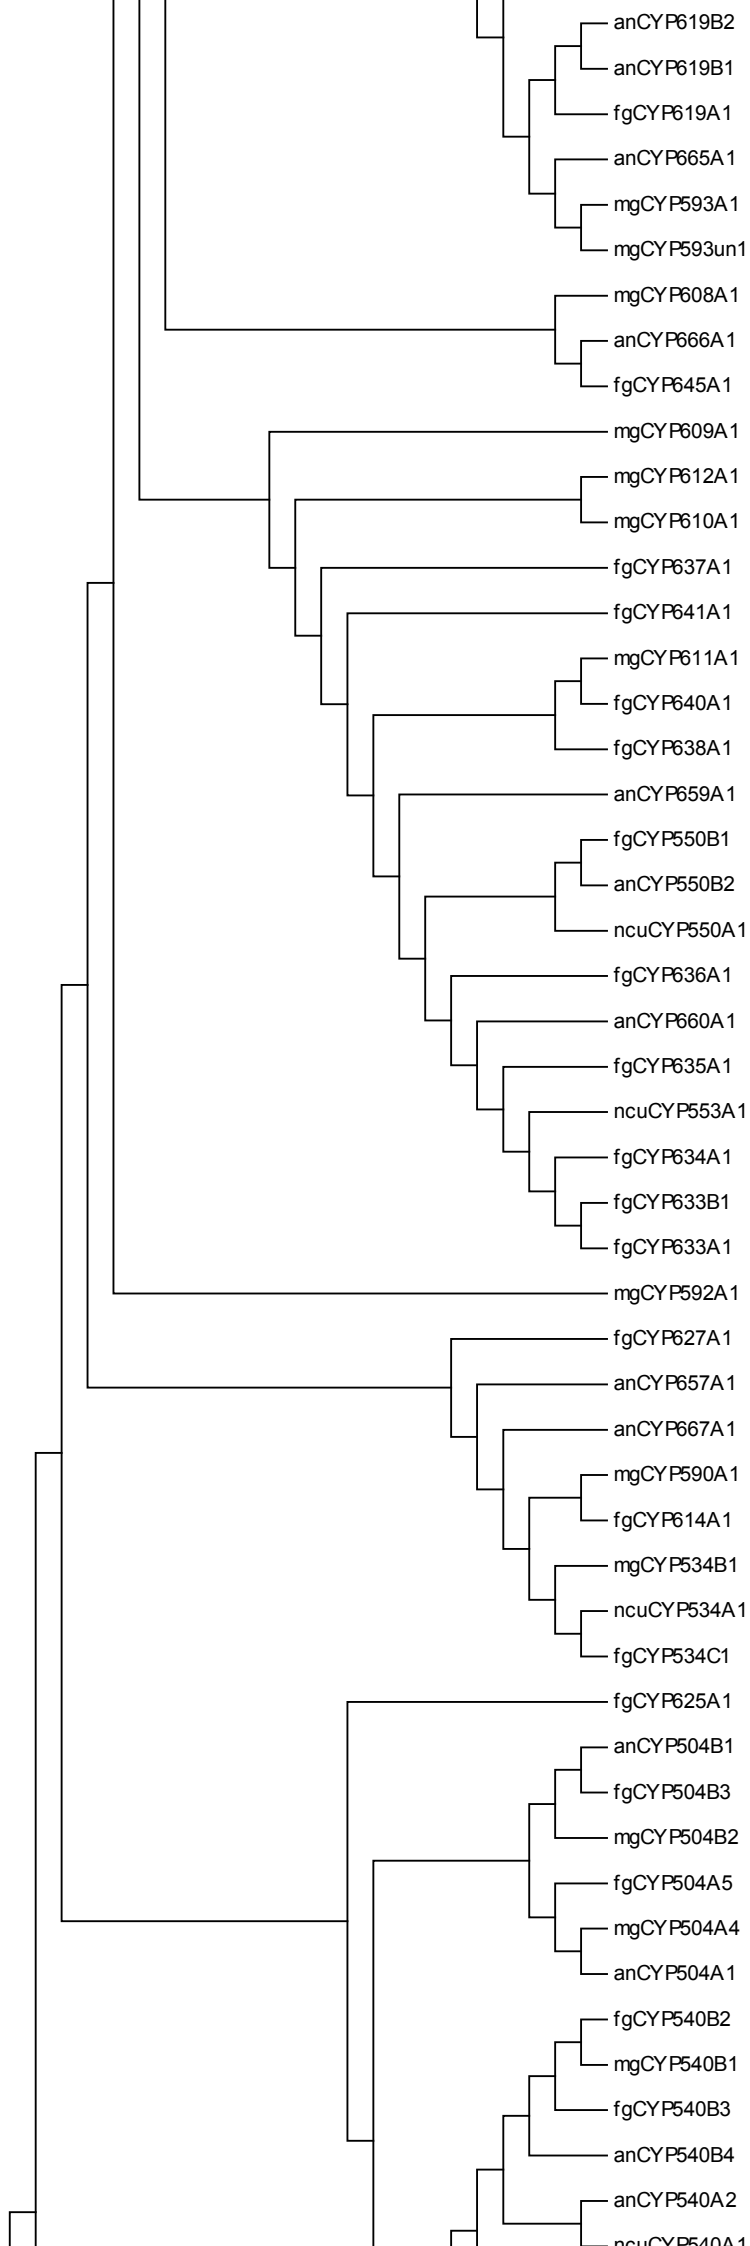

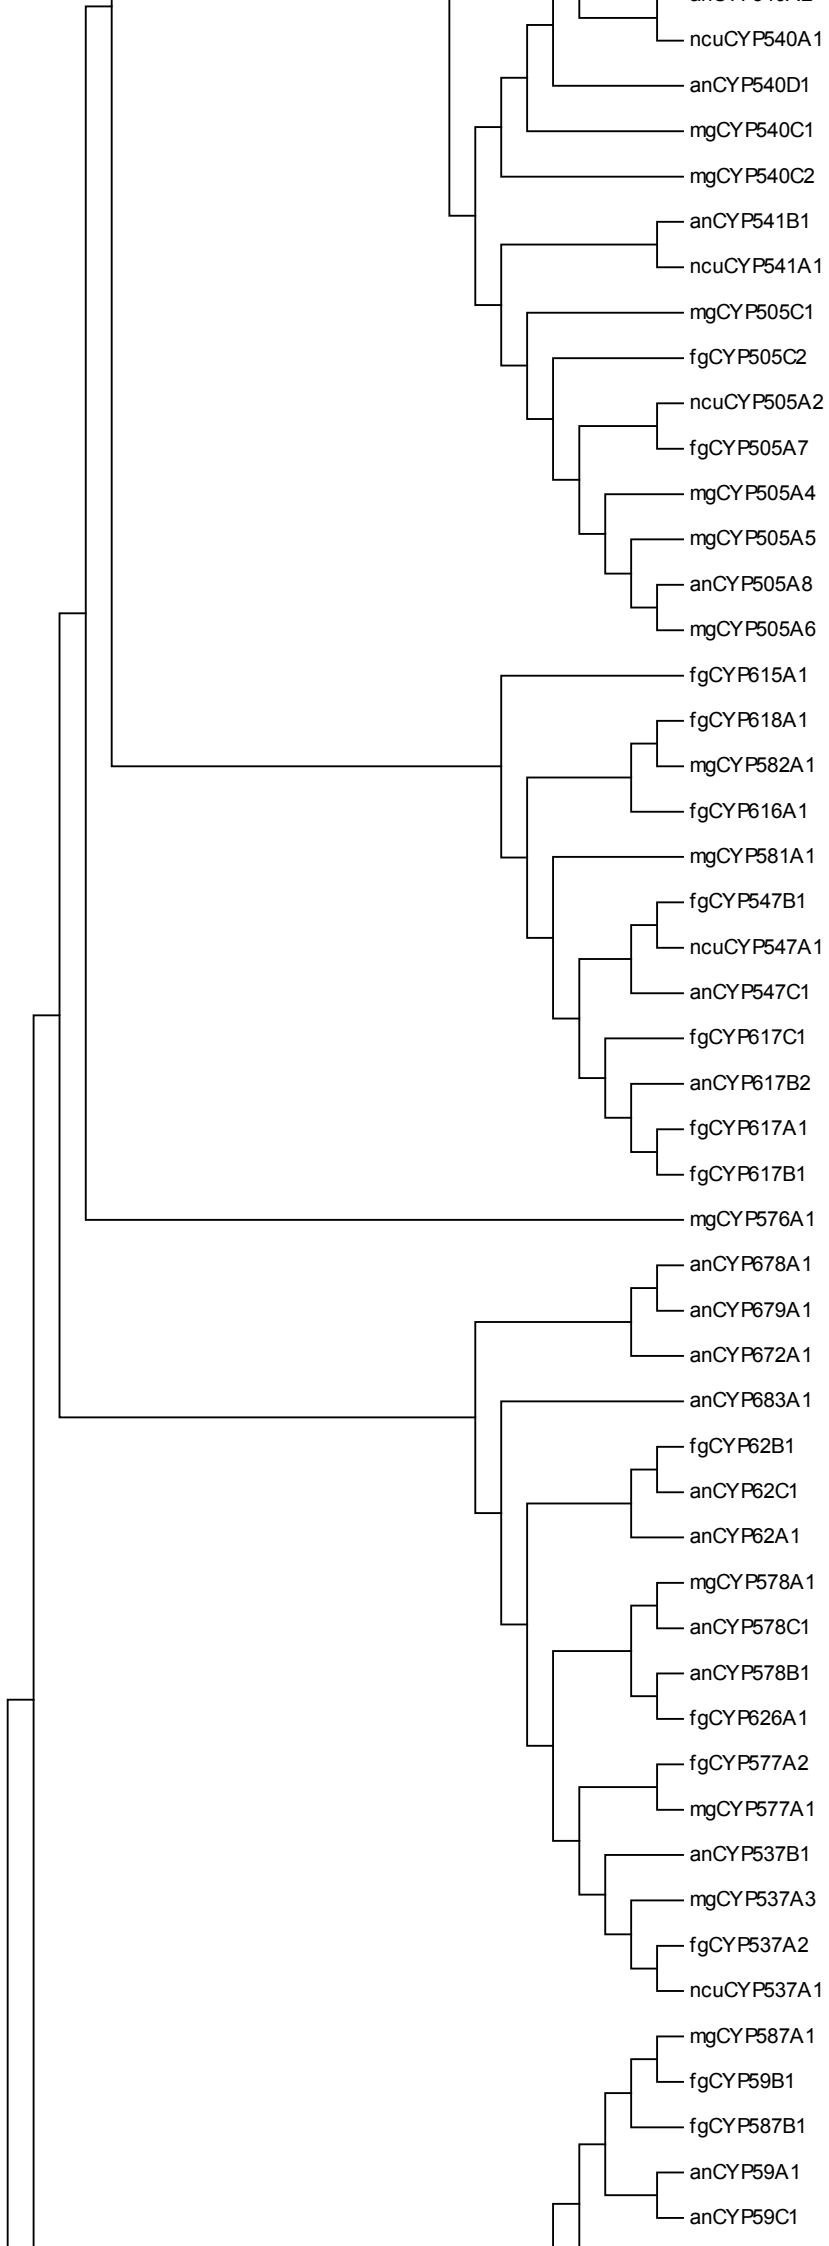

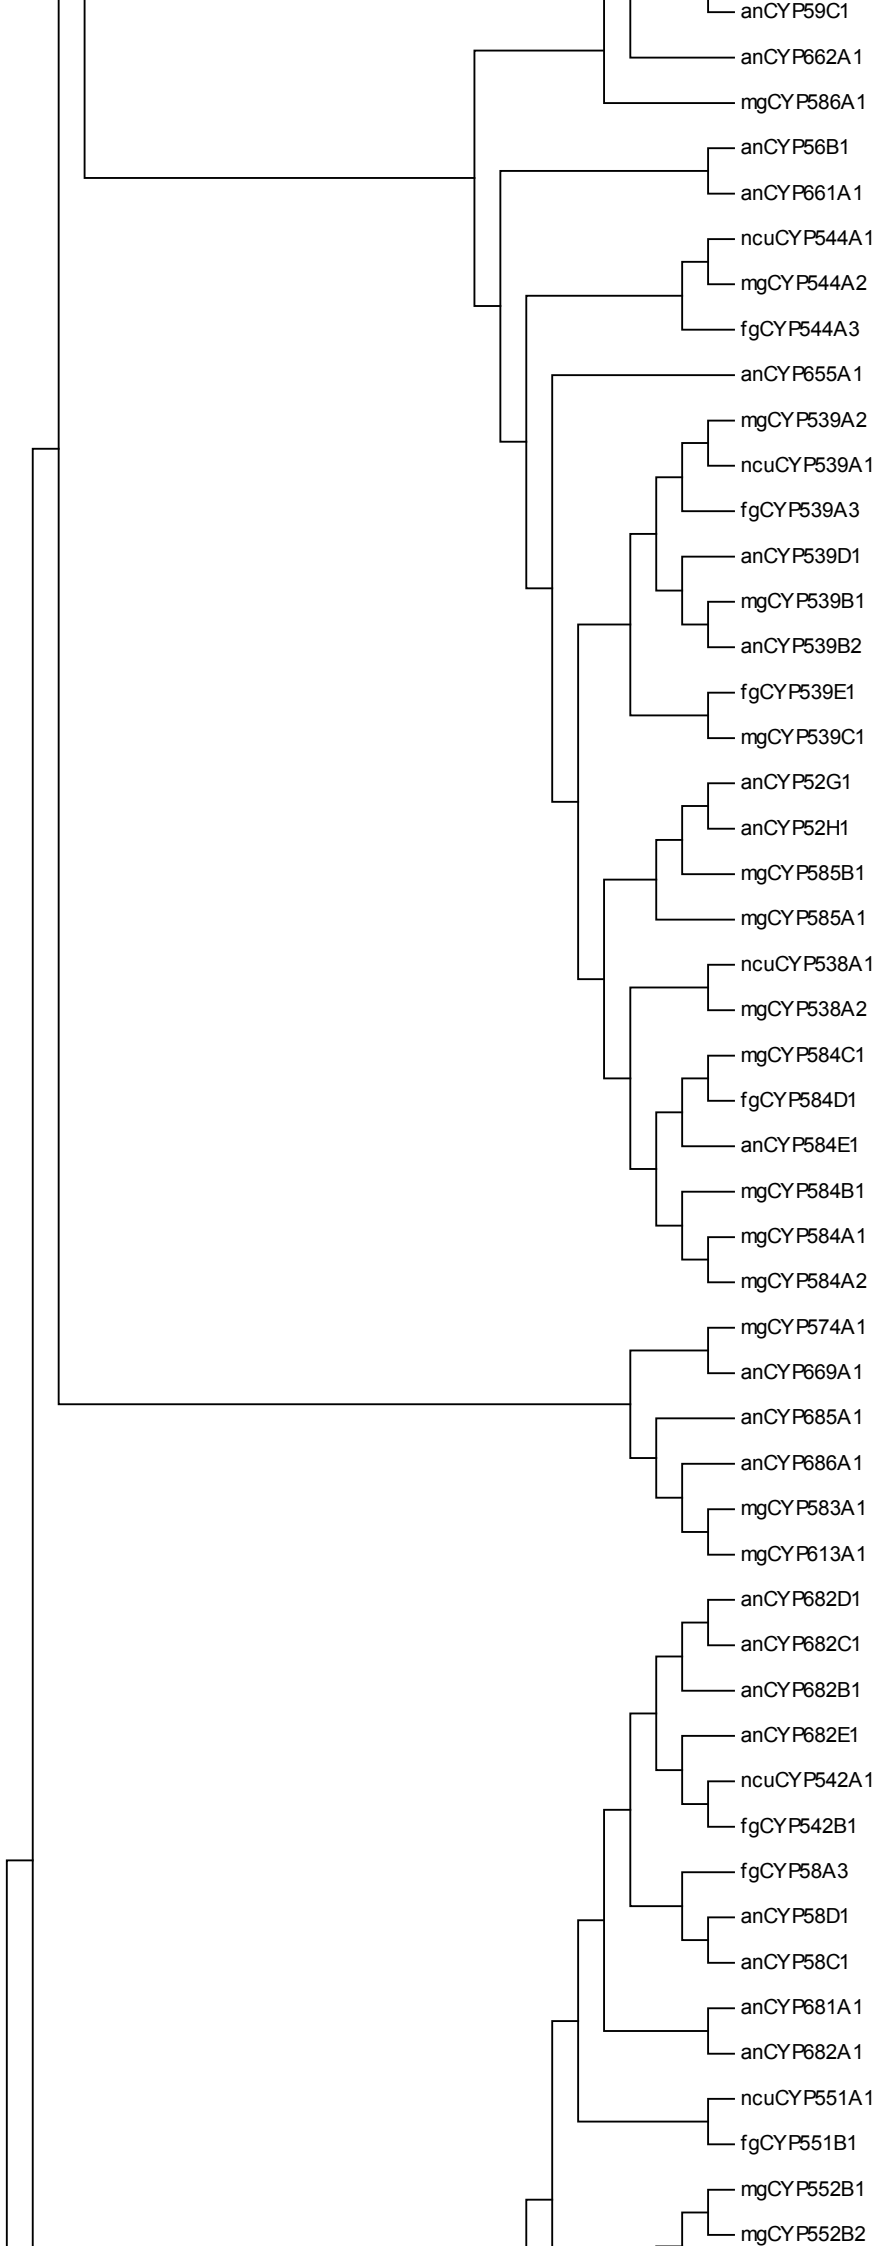

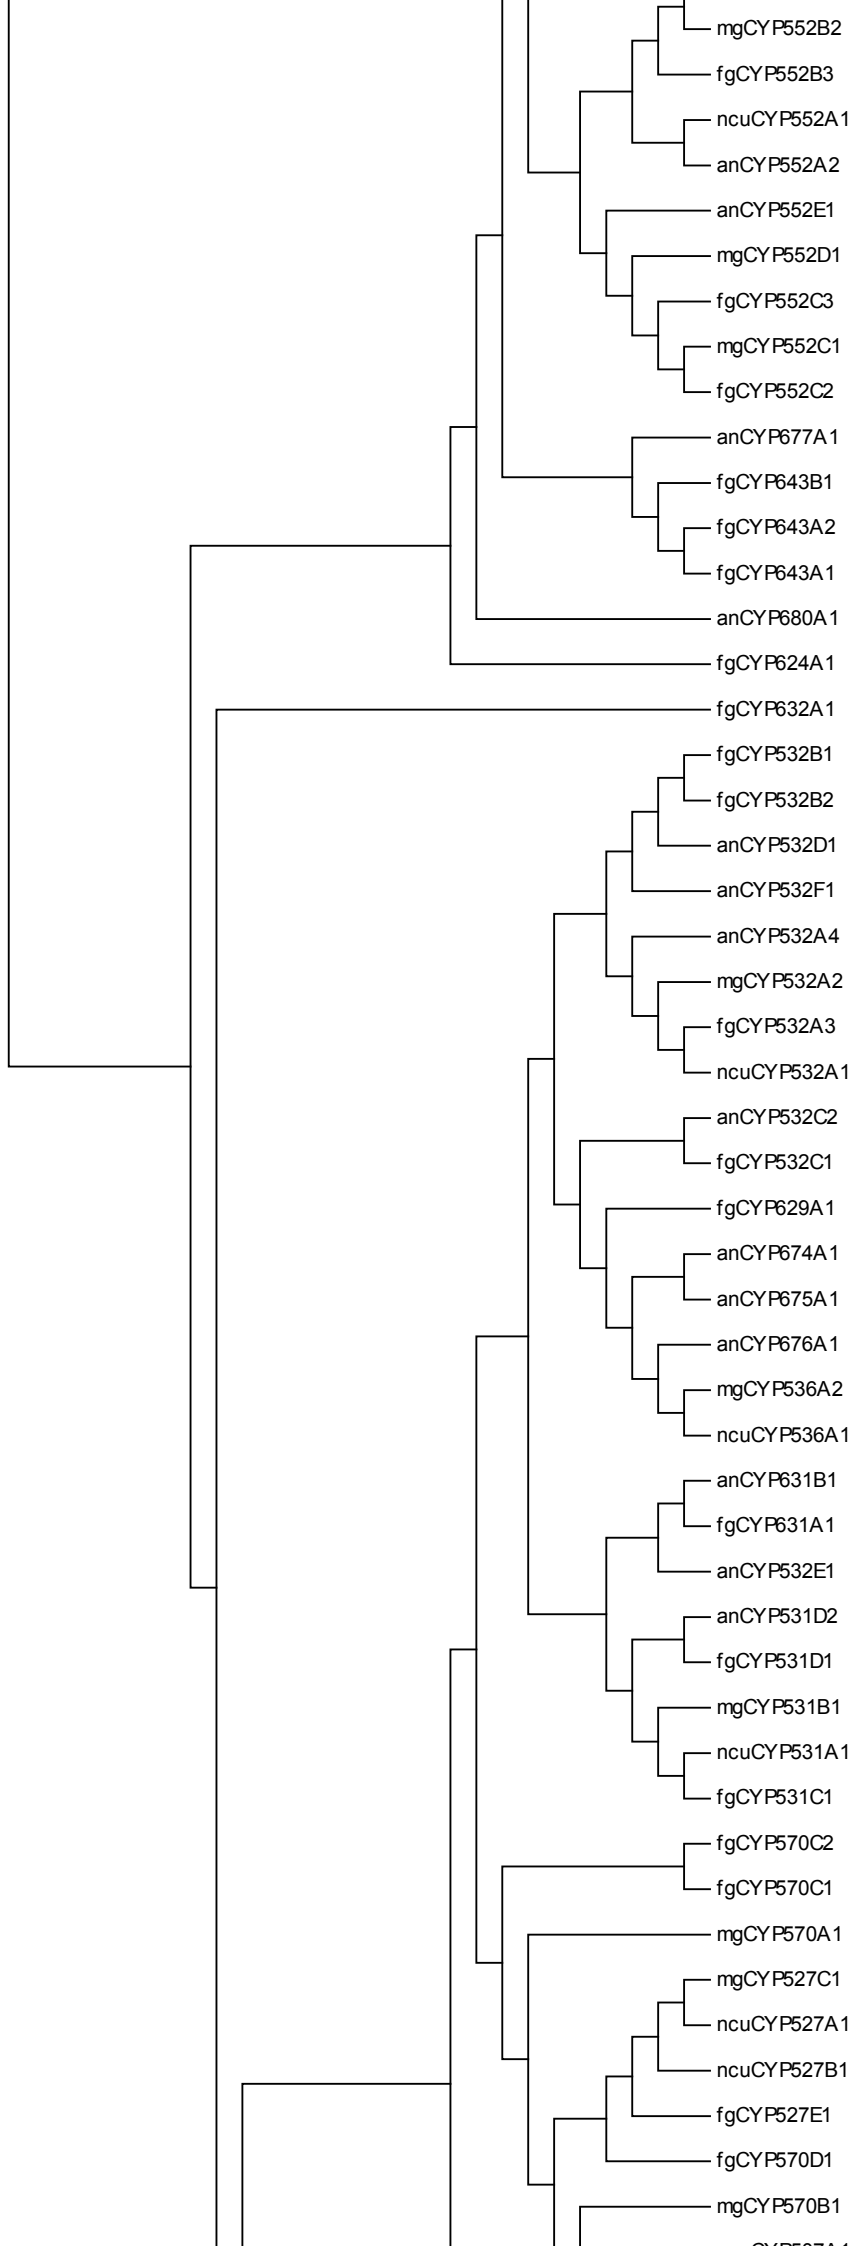

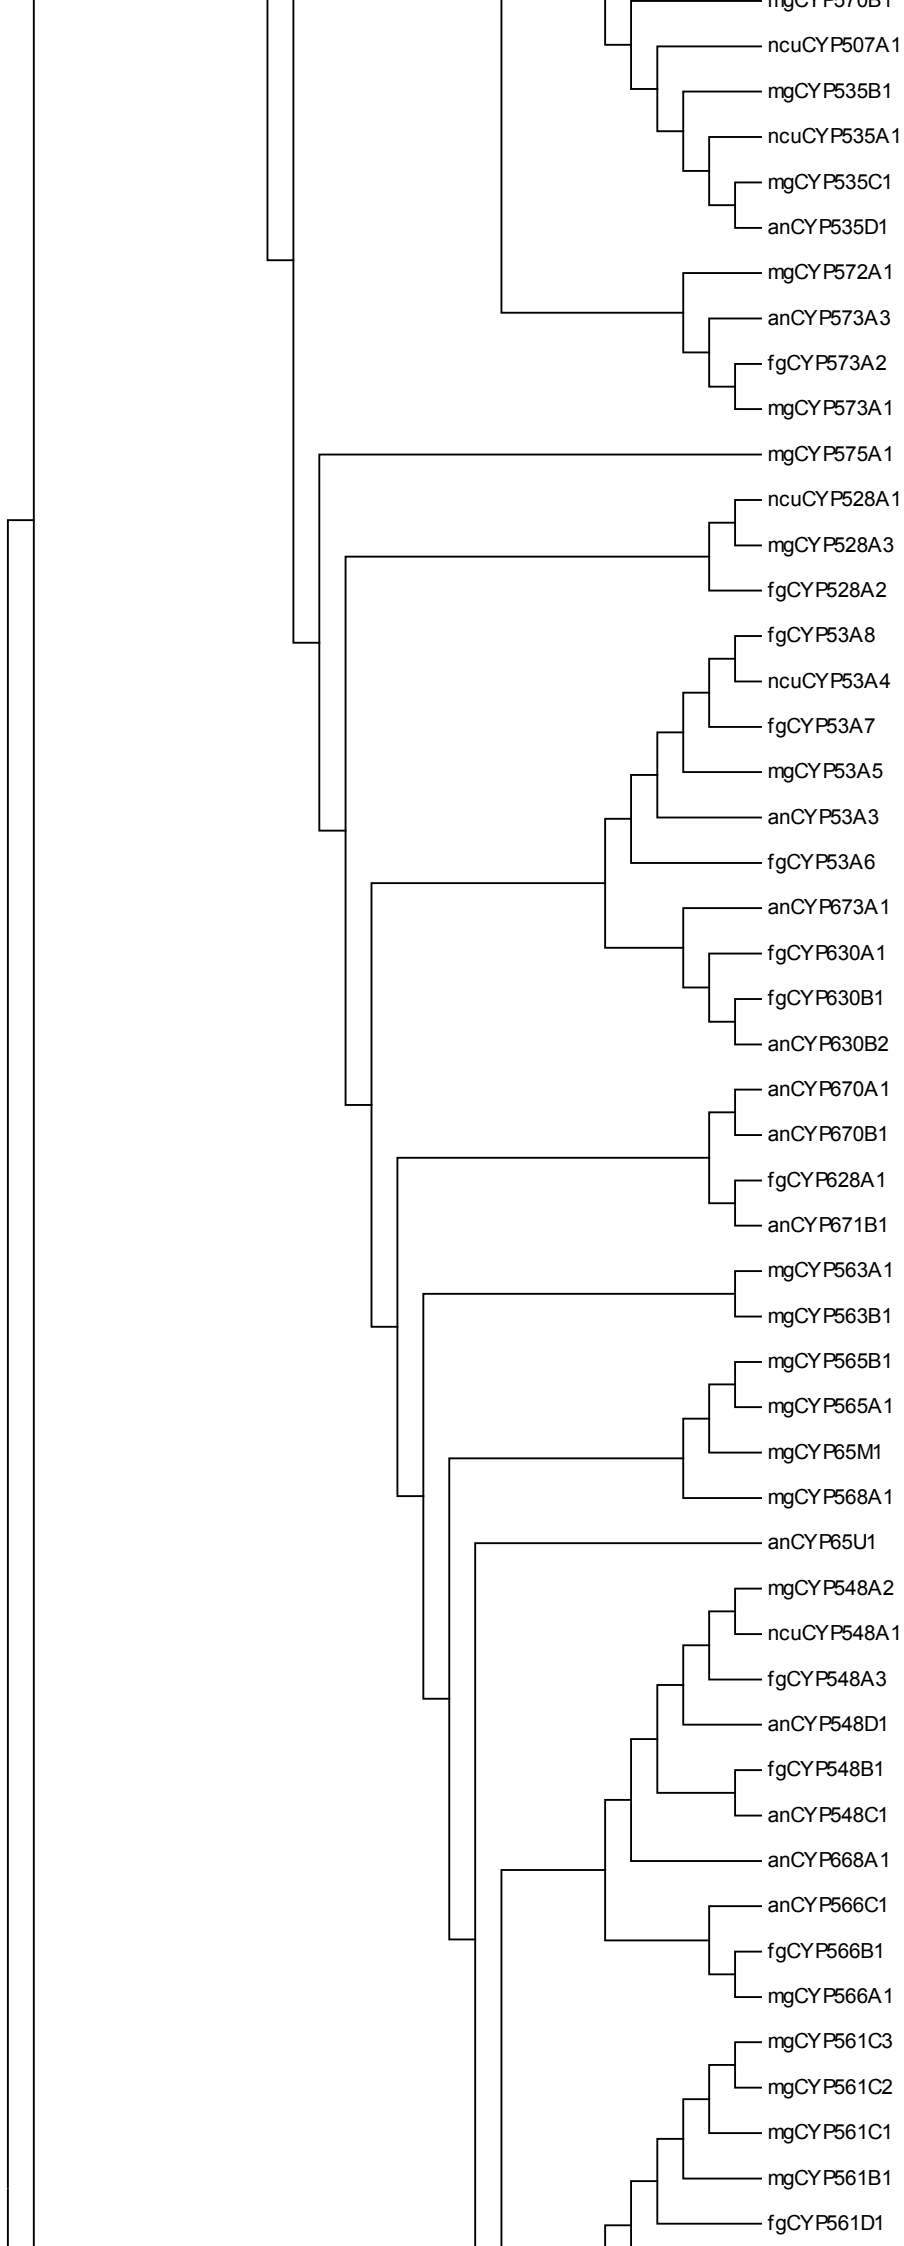

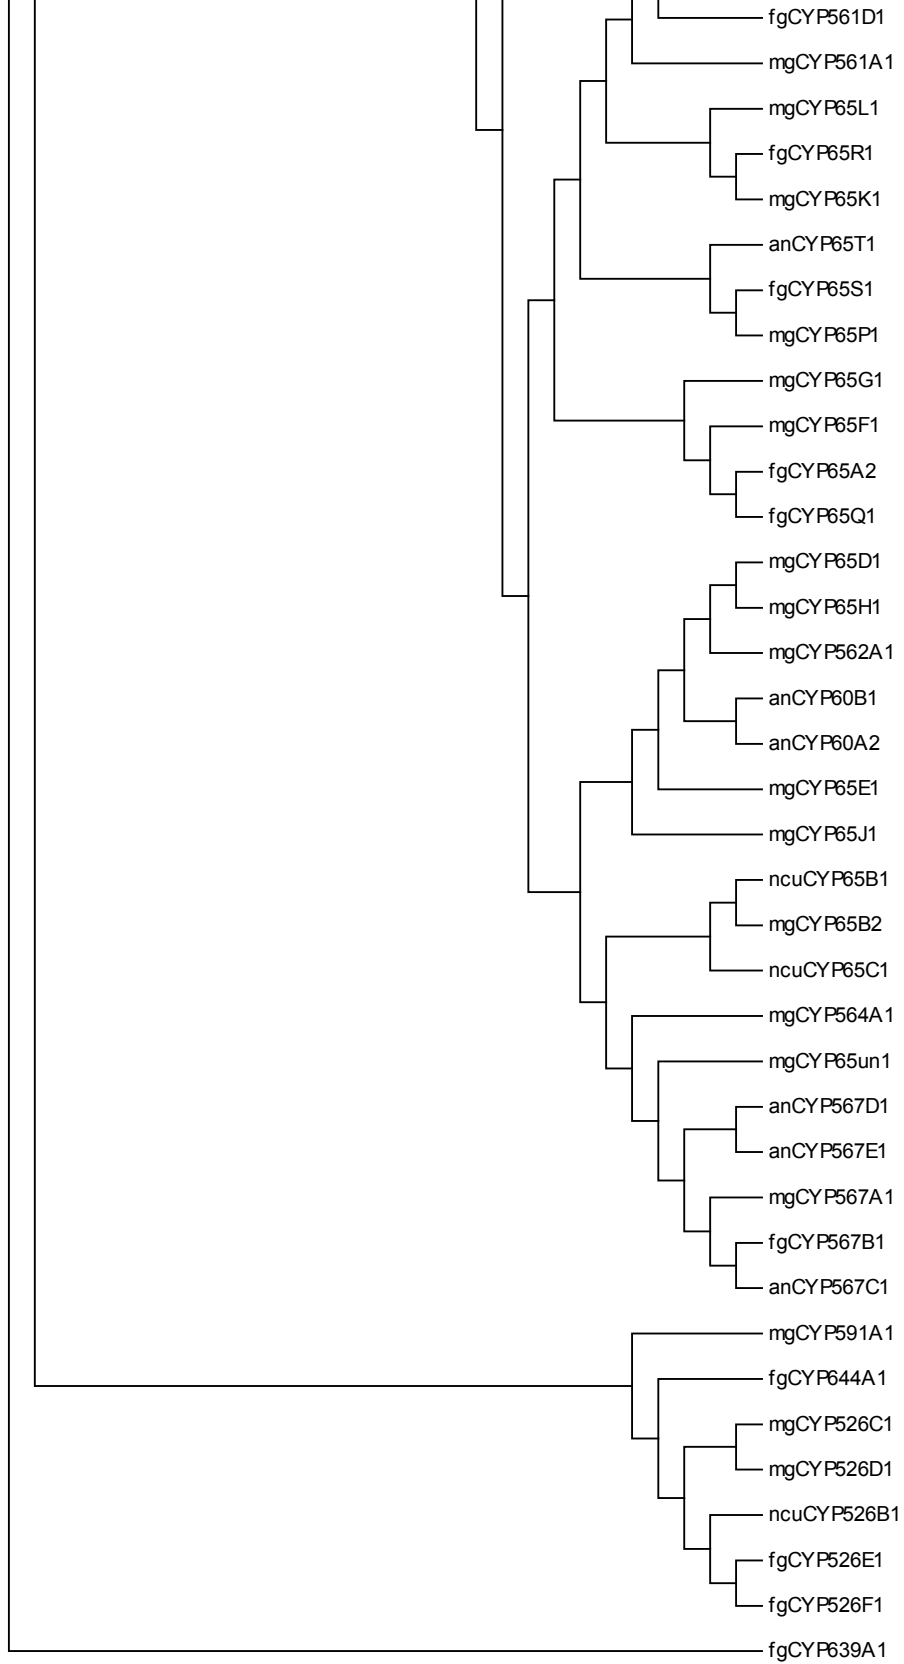

Supplement: 1471-2148-7-30-S3.pdf [file 1471-2148-7-30-S3.pdf]
